# Supplementary material for: Learner-Centered Inquiry in Undergraduate Biology: Positive Relationships with Long-Term Student Achievement
Source: Atypon-hosted journal article supplement (doi:10.1187/cbe.10-02-0011), 2010-12-01
Supplement: supp_f.pdf [file supp_f.pdf]

**APPENDIX F**

**RATING FORM AND RUBRICS FOR SCORING SENIOR INTERVIEWS**

**RATING FORM FOR SENIOR INTERVIEWS**

**Interviewer name:** \_\_\_\_\_

**Date:** \_\_\_\_\_

**Time:** \_\_\_\_\_

**Voice Recorder: recorder #:** \_\_\_\_\_ **folder:** \_\_\_\_\_ **file #:** \_\_\_\_\_

**To the interviewer:** For each student that you interview, provide ratings for some or all levels of Part I of the table below. You must provide a rating, based on the two rubrics provided to you, for Parts II and III.

|          | <b>Question Category</b>                             | <b>Rating (5 to 1)</b> |
|----------|------------------------------------------------------|------------------------|
| Part I   | Knowledge/comprehension                              |                        |
|          | Application                                          |                        |
|          | Analysis                                             |                        |
|          | Synthesis                                            |                        |
|          | Evaluation                                           |                        |
|          |                                                      |                        |
| Part II  | Lower Level<br>(knowledge/comprehension/application) |                        |
|          | Higher Level<br>(analysis, synthesis, evaluation)    |                        |
|          |                                                      |                        |
| Part III | Overall                                              |                        |

## RUBRICS FOR SCORING INTERVIEW RESPONSES

The criteria for each of the two rubrics is indicative of the types of cognitive skills our faculty believe a biology major should demonstrate prior to graduating.

### RUBRIC FOR SCORING LOWER-LEVEL QUESTIONS

| Rating                          | Criteria                                                                                                                                                                                                                                                                                                         |
|---------------------------------|------------------------------------------------------------------------------------------------------------------------------------------------------------------------------------------------------------------------------------------------------------------------------------------------------------------|
| <b>Level 5</b> - Excellent      | <ul style="list-style-type: none"><li>○ Factually correct</li><li>○ Can fully explain, describe, and defend answers given</li><li>○ Can give excellent examples for a topic or concept</li><li>○ Can fully apply concepts addressed as indicated by making correct predictions, solving problems, etc.</li></ul> |
| <b>Level 4</b> – Good           | <ul style="list-style-type: none"><li>○ Same as level 5 but has minor omissions or errors</li></ul>                                                                                                                                                                                                              |
| <b>Level 3</b> - Adequate       | <ul style="list-style-type: none"><li>○ Has some factual content wrong</li><li>○ Has some significant omissions in explanations, descriptions, and defense of answers given</li><li>○ Has difficulty providing examples for a topic or concept</li></ul>                                                         |
| <b>Level 2</b> - Below average  | <ul style="list-style-type: none"><li>○ Same as level 3 but has more significant errors and omissions</li></ul>                                                                                                                                                                                                  |
| <b>Level 1</b> – Unsatisfactory | <ul style="list-style-type: none"><li>○ Does not know the material</li><li>○ Lacks understanding of topics and concepts addressed</li></ul>                                                                                                                                                                      |

## RUBRIC FOR SCORING HIGHER LEVEL QUESTIONS

| Rating                          | Criteria                                                                                                                                                                                                                                                                                                                                                                                                                                                                                                                                                                                                                                                                                                                                                                                                                 |
|---------------------------------|--------------------------------------------------------------------------------------------------------------------------------------------------------------------------------------------------------------------------------------------------------------------------------------------------------------------------------------------------------------------------------------------------------------------------------------------------------------------------------------------------------------------------------------------------------------------------------------------------------------------------------------------------------------------------------------------------------------------------------------------------------------------------------------------------------------------------|
| <b>Level 5</b> - Excellent      | <ul style="list-style-type: none"> <li>○ Can fully explain how various components of a concept or process fit together</li> <li>○ Uses content accurately to explain the higher level parts of the questions</li> <li>○ Can predict an outcome and explain completely the steps involved to reach that outcome</li> <li>○ Can accurately and fully compare and contrast concepts or situations</li> <li>○ Understands how concepts inter-relate and can analyze problems from different points of view</li> <li>○ Can take new information and integrate it correctly and fully with prior knowledge</li> <li>○ Can design original problems or research studies</li> <li>○ Can combine parts to parts to make a new whole</li> <li>○ Can articulate a persuasive argument in defense of an idea or solution.</li> </ul> |
| <b>Level 4</b> – Good           | <ul style="list-style-type: none"> <li>○ Same as level 5 but has some difficulties or weaknesses in responses</li> </ul>                                                                                                                                                                                                                                                                                                                                                                                                                                                                                                                                                                                                                                                                                                 |
| <b>Level 3</b> - Adequate       | <ul style="list-style-type: none"> <li>○ Has some significant inadequacies in when breaking down information into component parts, combining parts to make a new whole, and/or judging the value or worth of information or ideas.</li> </ul>                                                                                                                                                                                                                                                                                                                                                                                                                                                                                                                                                                            |
| <b>Level 2</b> - Below average  | <ul style="list-style-type: none"> <li>○ Same as level 3 but has more significant errors, omissions, and lack of cognitive skills.</li> </ul>                                                                                                                                                                                                                                                                                                                                                                                                                                                                                                                                                                                                                                                                            |
| <b>Level 1</b> – Unsatisfactory | <ul style="list-style-type: none"> <li>○ Lacks skills necessary to apply, synthesis, and evaluate information and ideas.</li> </ul>                                                                                                                                                                                                                                                                                                                                                                                                                                                                                                                                                                                                                                                                                      |
